# Supplementary material
Source: publisher figshare collection journal article supplement (https://frontiersin.figshare.com/ndownloader/files/14250935)
Supplement: Supplementary file [file 14250935]

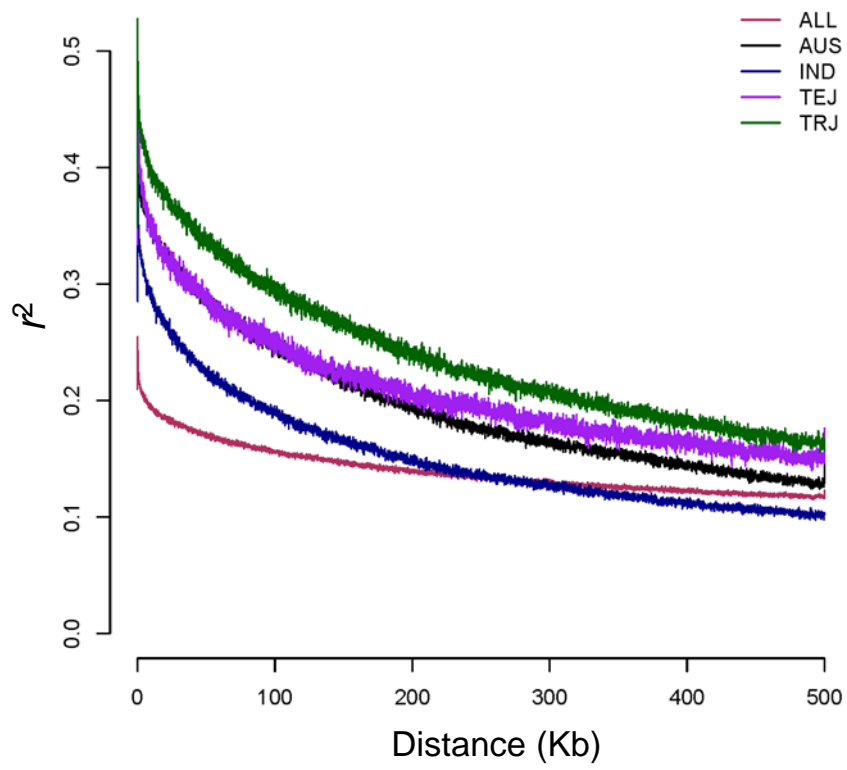

**Figure S2. Linkage disequilibrium (LD) decay analysis of the rice population and subpopulations used in this study. LD is used as a function of distance between SNPs.**
